# Supplementary material for: Anthocyanin (ATH)-incorporating polyvinylpyrrolidone-ethyl cellulose-(2-hydroxypropyl)-β-cyclodextrin (PVP–EC–BCD) nanofiber-based pH sensor for ocular pH detection during accidental chemical spills
Source: Royal Society of Chemistry journal article supplement (doi:10.1039/d5na00819k), 2025-11-26

Step 1

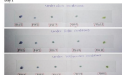

After 4 weeks

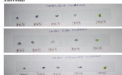

After 8 weeks

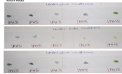

After 12 weeks

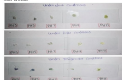

After 2 weeks

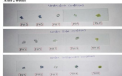

After 4 weeks

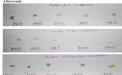

After 8 weeks

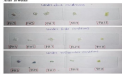

After 12 weeks

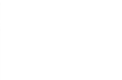

Supplement: d5na00819k3.pdf [file d5na00819k3.pdf]
