# Supplementary material for: Anthocyanin (ATH)-incorporating polyvinylpyrrolidone-ethyl cellulose-(2-hydroxypropyl)-β-cyclodextrin (PVP–EC–BCD) nanofiber-based pH sensor for ocular pH detection during accidental chemical spills
Source: Royal Society of Chemistry journal article supplement (doi:10.1039/d5na00819k), 2025-11-26
Supplement: d5na00819k4.pdf [file d5na00819k4.pdf]

## **Anthocyanin (ATH)-incorporated polyvinylpyrrolidone-ethyl cellulose-(2-Hydroxypropyl)- $\beta$ -cyclodextrin (PVP-EC-BCD) nanofibers-based pH sensor for ocular pH detection during accidental chemical spills**

### Supplementary Material

Benuwan Sandaruwan <sup>a</sup>, Renuka Liyanage <sup>b</sup>, Pabakara Costha <sup>c</sup>, Rohan S. Dassanayake <sup>a</sup>, Ruchire Eranga Wijesinghe <sup>d,e</sup>, H. M. L. P.B. Herath <sup>f</sup>, K.M. Nalin de Silva <sup>f</sup>, Rohini M. de Silva <sup>f,g</sup>, Suranga M. Rajapaksha <sup>b</sup>, Udaya Wijenayake <sup>h</sup> and Danushika C. Manatunga <sup>a,f\*</sup>

<sup>a</sup> Department of Biosystems Technology, Faculty of Technology, University of Sri Jayewardenepura, Pitipana North, Homagama 10200, Sri Lanka.

<sup>b</sup> Department of Materials and Mechanical Technology, Faculty of Technology, University of Sri Jayewardenepura, Pitipana North, Homagama 10200, Sri Lanka.

<sup>c</sup> National Eye Hospital of Sri Lanka, Colombo, 01000, Sri Lanka.

<sup>d</sup> Center for Excellence in Informatics, Electronics & Transmission (CIET), Sri Lanka Institute of Information Technology, Malabe 10115, Sri Lanka.

<sup>e</sup> Department of Electrical and Electronic Engineering, Faculty of Engineering, Sri Lanka Institute of Information Technology, Malabe, 10115, Sri Lanka.

<sup>f</sup> Center for Advanced Materials and Devices (CAMD), Department of Chemistry, University of Colombo, PO Box 1490, University of Colombo, Colombo 00300, Sri Lanka.

<sup>g</sup> Department of Life Sciences, Faculty of Science, NSBM Green University, Homagama, 10200, Sri Lanka

<sup>h</sup> Department of Computer Engineering, Faculty of Engineering, University of Sri Jayewardenepura, Nugegoda 10250, Sri Lanka.

Corresponding author E-mail: danushi@sjp.ac.lk

(a)

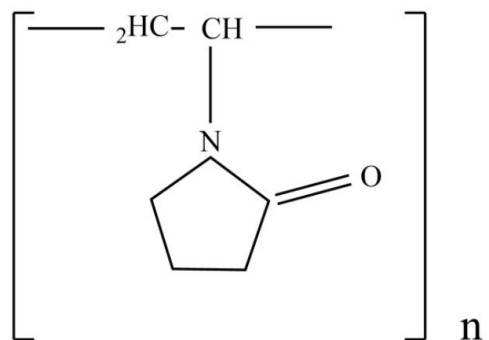

(b)

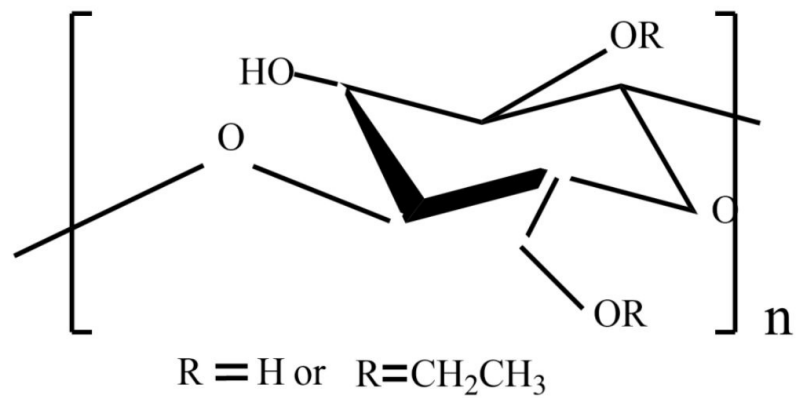

(c)

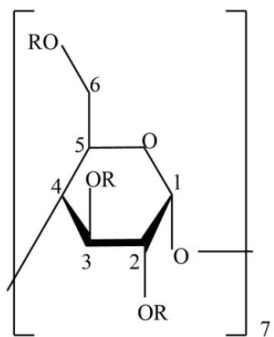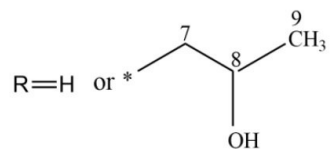

(d)

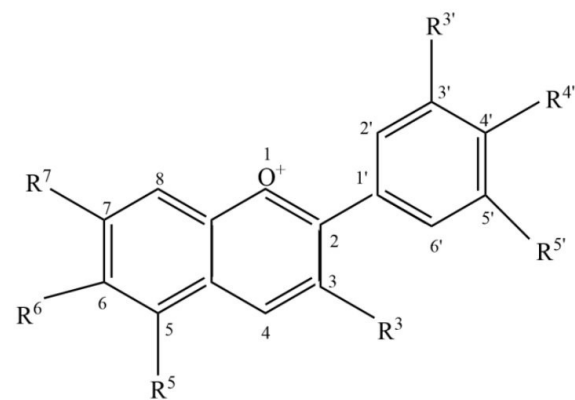

Figure S1. Chemical structures of (a) PVP (b) EC (c) BCD (d) ATH

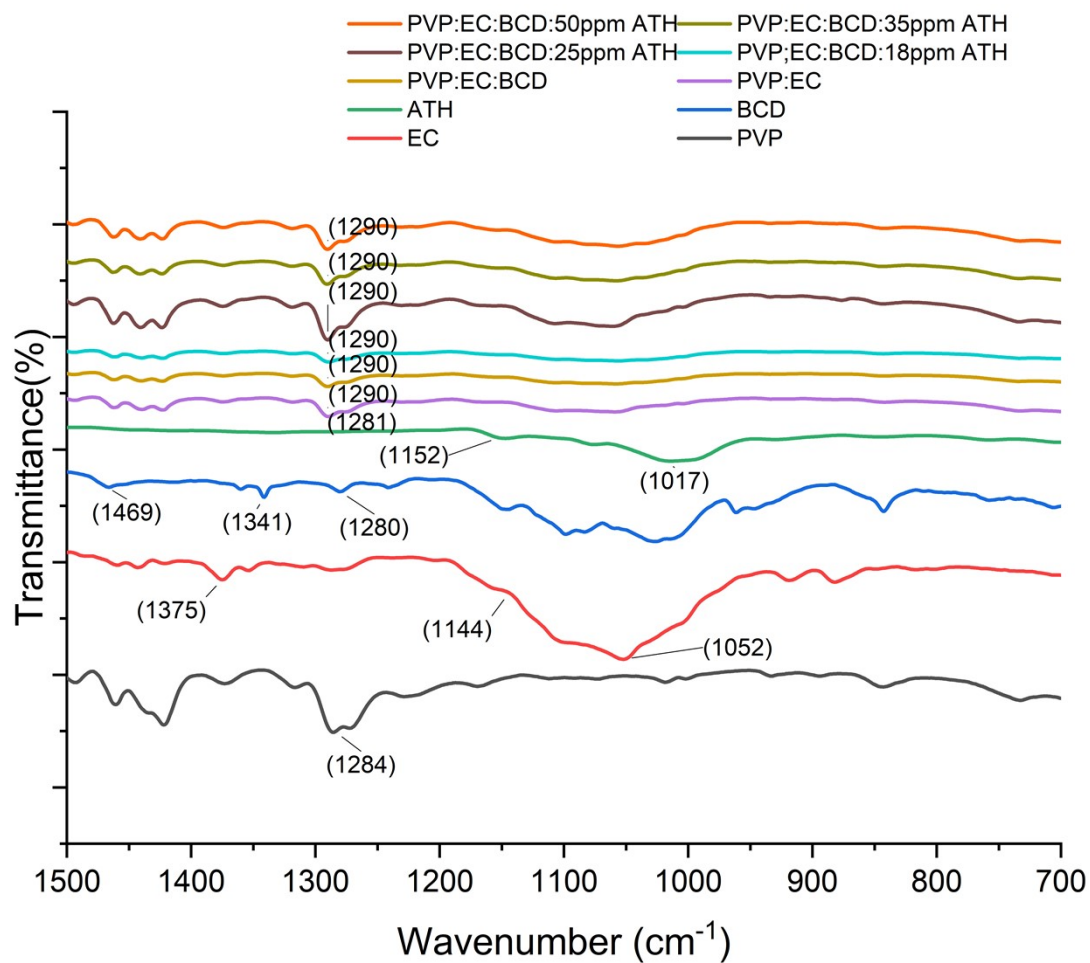

Figure S2. Enlarged FTIR spectra of the samples in the 700-1500  $\text{cm}^{-1}$  wavelength range.

Day 1

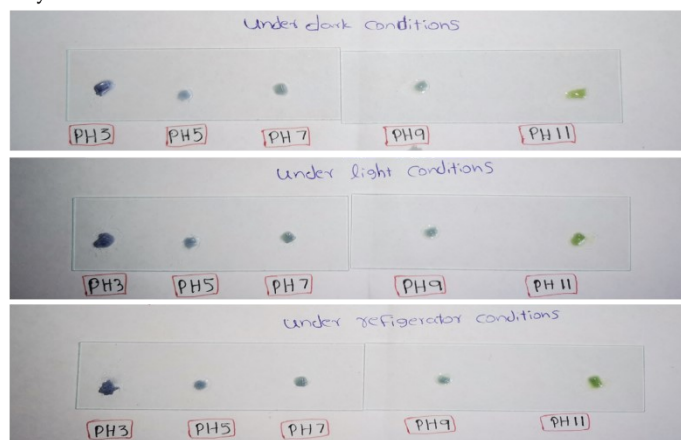

After 4 weeks

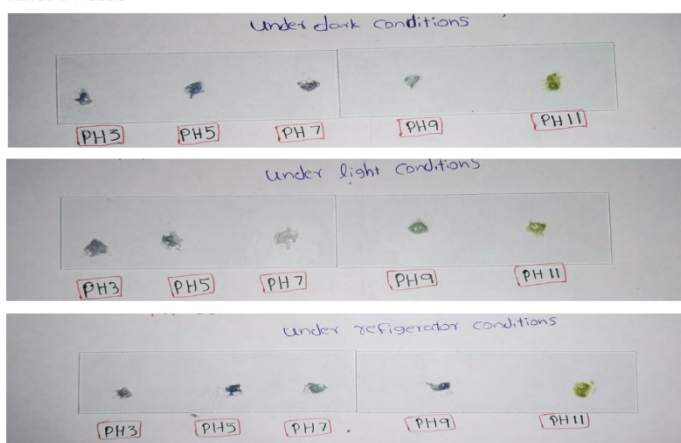

After 8 weeks

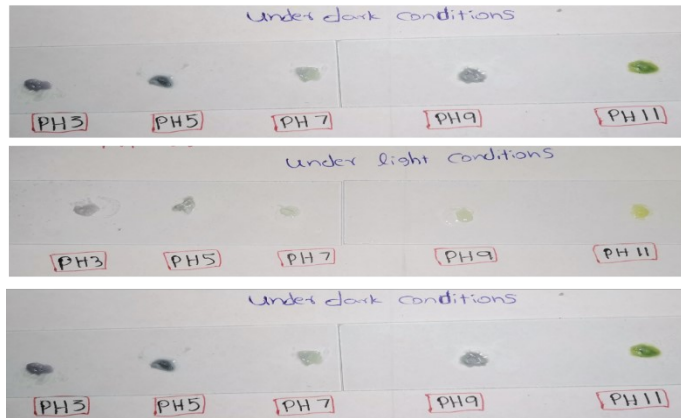

After 12 weeks

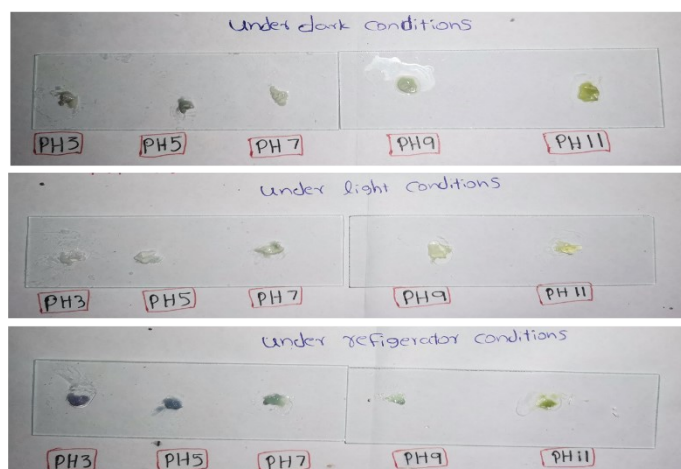

After 2 weeks

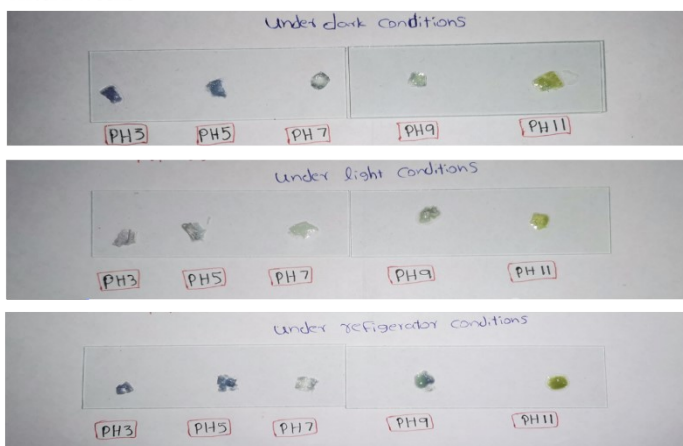

After 6 weeks

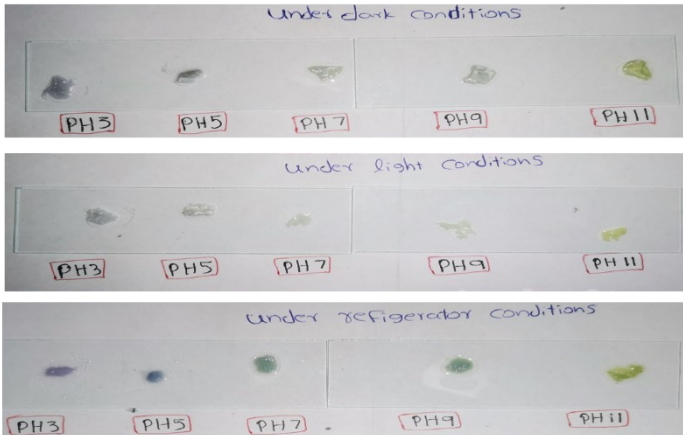

After 10 weeks

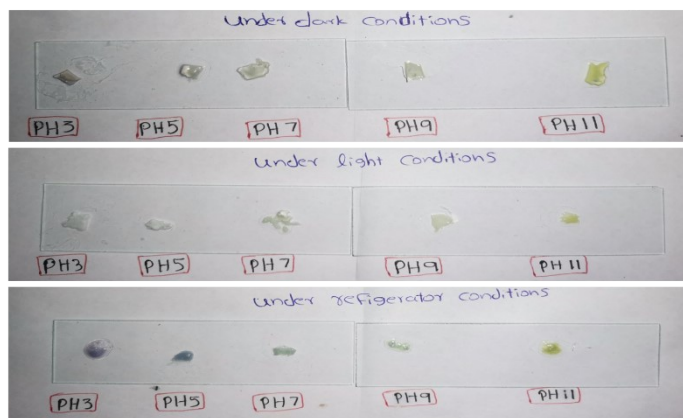

Figure S3. Shelf life evaluation of pH-sensitive electrospun nanofiber mats over time points of day 1, 2 weeks, 4 weeks, 6 weeks, 8 weeks, 10 weeks, and 12 weeks.
